# Supplementary material
Source: PubMed Central journal article supplement (PMC2982930)
Supplement: NIHMS242705-supplement-6.pdf [file NIHMS242705-supplement-6.pdf]

Supplement Table 1: Primers used in real-time PCR.

| Gene    | Forward primer (5'-3')      | Reverse primer (5'-3')         | Product(bp) |
|---------|-----------------------------|--------------------------------|-------------|
| Cld7    | AACAGTTGCAGAGTCACTGAAG      | GAGAAAGGCACGATACACTGG          | 213         |
| GAPDH   | GATTCCACCCATGGCAAATTC       | TGGGATTTCCATTGATGACAAG         | 72          |
| CDK7    | GCCAACACCTGGATGTCAGC        | GCTGGATTTGATTGCTCC             | 147         |
| CCNH    | AACTTAGTAA AGAAGTATGA ACC   | CGTTAAGTGCAAGCTCAGCAG          | 111         |
| ERCC2   | AAATTTGAGACCCGGGAGGA        | TAGGGGACGCCAAACATGAT           | 356         |
| BTG2    | TGGGCTTAGGGAACCATCTCT       | TTCAGCCAAGGAATACATGCAA         | 79          |
| GADD45A | GAGAGCAGAAGACCGAAAGGA       | CACAACACCACGTTATCGGG           | 145         |
| GADD34  | TCAATTTGCAGATGGCCAGCGTGCTCC | CCTCGGCTTTCTCCTCCCCTGGGTTCTTAT | 97          |
| GADD153 | GGCAGCTGAGTCATTGCC          | GCAGATTCACCATTTCGGTCA          | 496         |

Supplement Table2: Changes of DNA copy numbers of various tumor suppressors

(candidates) in 776 tumor cell lines from multiple tissues.

| Gene   | High-Level Amplification (>7) | Homozygous Deletion | LOH | mutation |
|--------|-------------------------------|---------------------|-----|----------|
| RB1    | 3                             | 18                  | 319 | 97       |
| TP53   | 0                             | 5                   | 482 | 489      |
| PTEN   | 0                             | 33                  | 264 | 84       |
| Cld7   | 2                             | 2                   | 316 | 0        |
| RCBTB2 | 3                             | 10                  | 314 | 1        |
| ING1   | 5                             | 0                   | 255 | 0        |
